# Supplementary material for: Perivascular AQP4 dysregulation in the hippocampal CA1 area after traumatic brain injury is alleviated by adenosine A2A receptor inactivation
Source: PubMed Central journal article supplement (PMC5440401; doi:10.1038/s41598-017-02505-6), 2017-05-22
Supplement: 41598_2017_2505_MOESM1_ESM.pdf [file 41598_2017_2505_MOESM1_ESM.pdf]

# Perivascular AQP4 dysregulation in the hippocampal CA1 area after traumatic brain injury is alleviated by adenosine A<sub>2A</sub> receptor inactivation

## Authors:

Zi-Ai Zhao<sup>1</sup>, Ping Li<sup>1</sup>, Shi-Yang Ye<sup>1</sup>, Ya-Lei Ning<sup>1</sup>, Hao Wang<sup>2</sup>, Yan Peng<sup>1</sup>, Nan Yang<sup>1</sup>, Yan Zhao<sup>1</sup>, Zhuo-Hang Zhang<sup>1</sup>, Jiang-Fan Chen<sup>3</sup>, Yuan-Guo Zhou<sup>1,\*</sup>

Figure S1

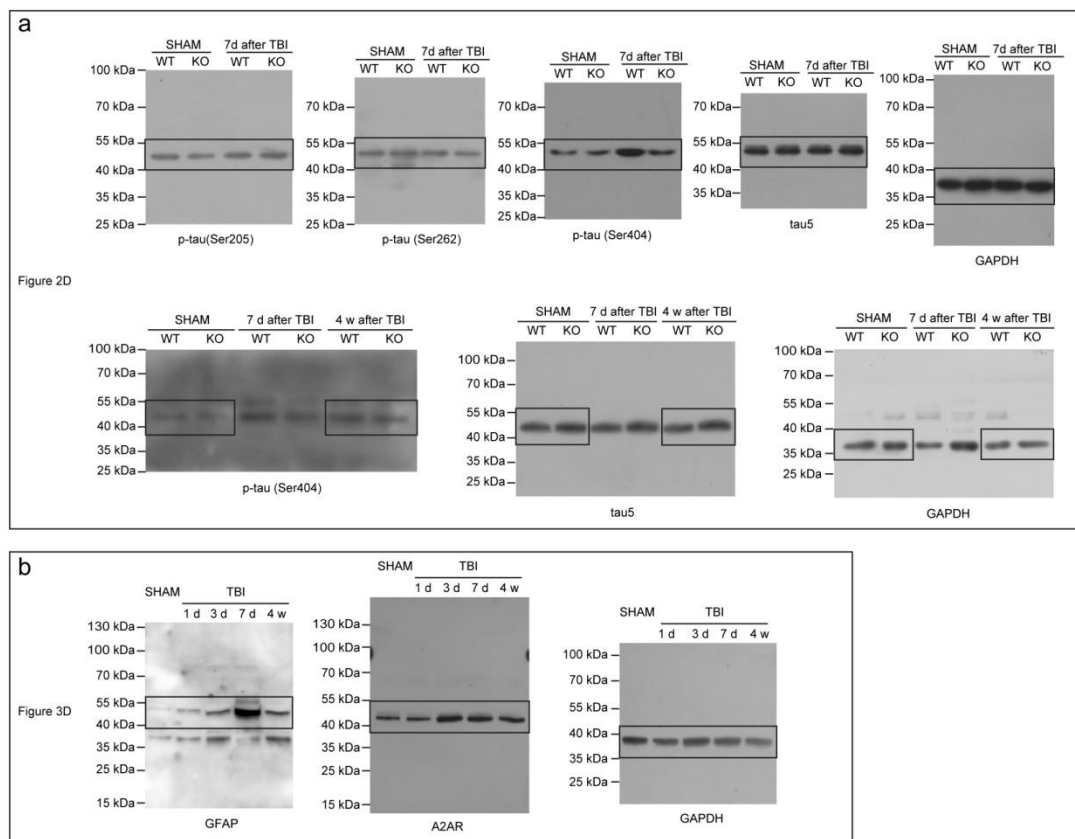

## Figure legend

**Figure S1. Supplementary full length blots for cropped blots shown in the main figures.**

(a) Full length blots for cropped blots (black box) shown in Fig. 2d. (b) Full length blots for cropped blots (black box) shown in Fig. 4d.
